# Supplementary material for: Monitoring iCCM referral systems: Bugoye Integrated Community Case Management Initiative (BIMI) in Uganda
Source: PubMed Central journal article supplement (PMC4850682; doi:10.1186/s12936-016-1300-z), 2016-04-29

# 1. ASK THE CAREGIVER

How old is the child?

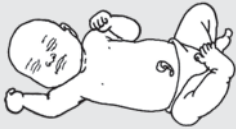

0 - 7 days

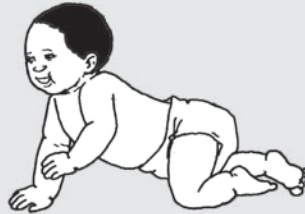

2 - 11 months

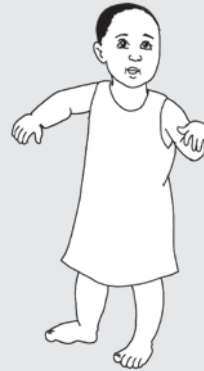

1 - 2 years

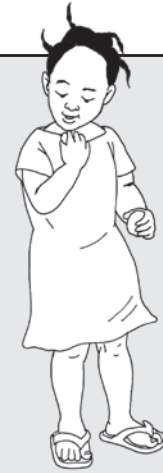

3 - 5 years

# 2. ASK - CHILD'S PROBLEMS

Does the child have cough, diarrhoea or fever?

*If yes, for how long?*

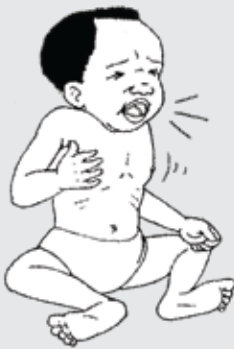

Cough

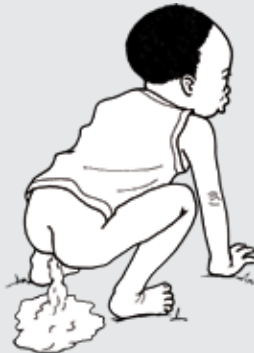

Diarrhoea

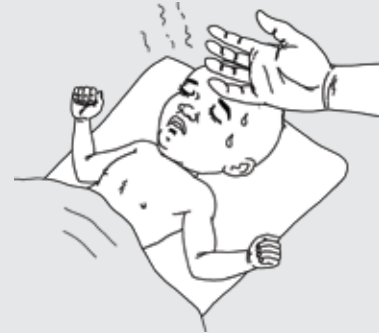

Fever

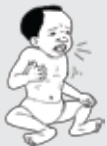

If **Cough** is present, check for **Fast Breathing**.

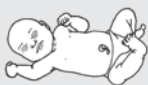

0 - 7 days

**60 or more**  
breaths per minute

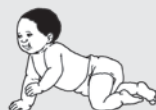

2-11 months

**50 or more**  
breaths per minute

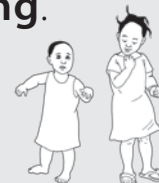

1-5 years

**40 or more**  
breaths per minute

# 3. ASK AND LOOK FOR DANGER SIGNS AND REFER

Refer to Step 4a because children with some of these danger signs need pre-referral treatment.

Any child or newborn with...

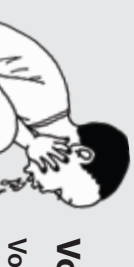

**Vomiting**   
Vomits everything

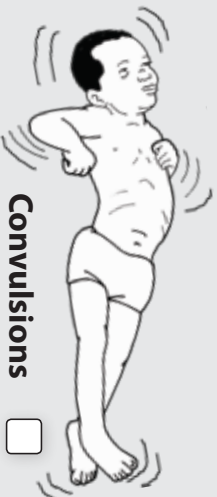

**Convulsions**

**Chest in-drawing**

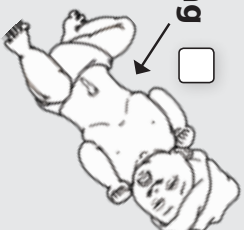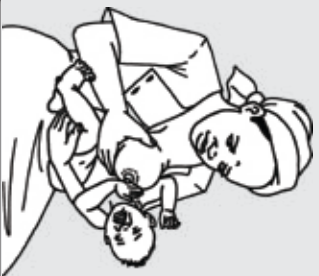

**Not able to breastfeed or drink**

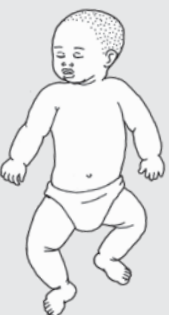

**Very sleepy or unconscious**

A newborn with...

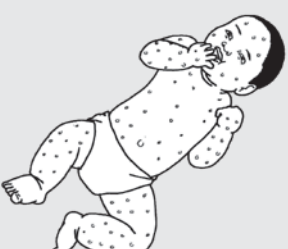

**Many skin pustules**

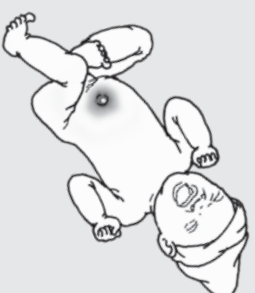

**Infected umbilical cord**

A child with...

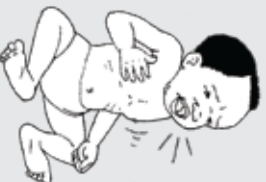

**Cough**   
For 21 days or more

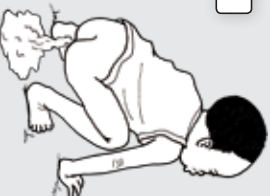

**Diarrhoea**   
For 14 days or more, or with blood

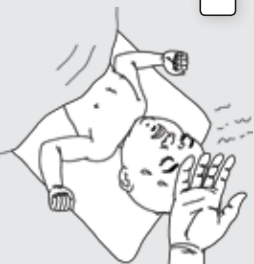

**Fever**   
For 7 days or more

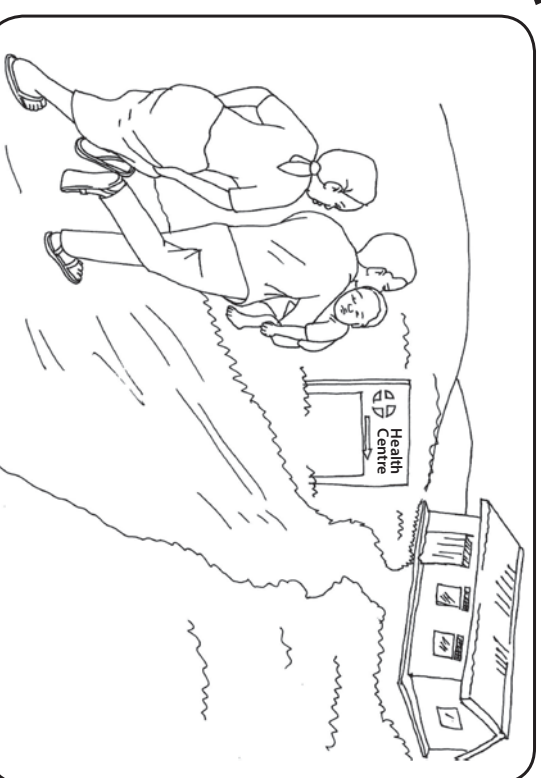

# 4a. PRE-REFERRAL TREATMENT

If the child has any of the danger signs below, give the following treatment:

## Diarrhoea

For 14 days or more, or with blood in the stool

- Begin giving the child ORS before you refer. Advise caregiver to continue giving ORS to the child on the way to the health centre.

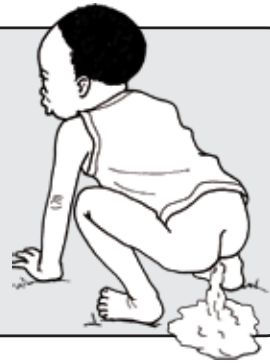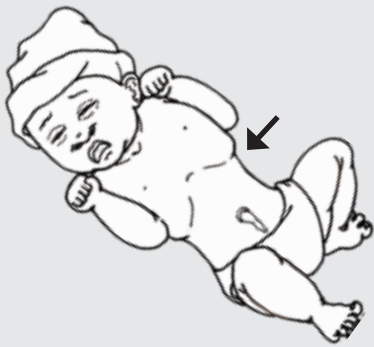

## Chest In-drawing or Fast Breathing

With a Danger Sign

- Give first dose of Amoxicillin before you refer.

2 - 11 months:  2 tabs from RED PACK

1 - 5 years:  3 tabs from GREEN PACK

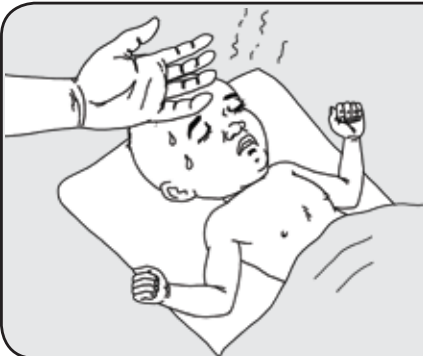

## Fever

For 7 days or more

- Give first dose oral Anti-Malarial ACT.

4 months - 2 years:  1 tab from YELLOW PACK

3 - 5 years:  2 tabs from BLUE PACK

## Fever and a General Danger Sign

- Give Rectal Artesunate.

4 - 11 months:  1 cap

1 - 3 years:  2 caps

4 - 5 years:  4 caps

- Help caregiver give dose.

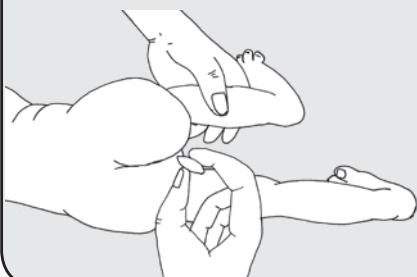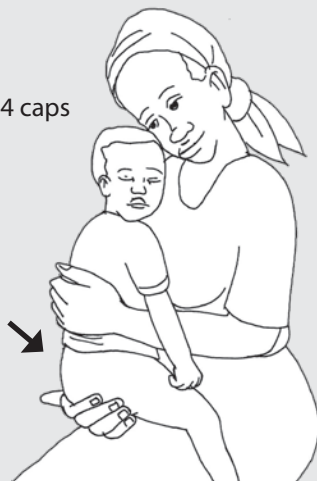

## Newborn

With a Danger Sign

- REFER

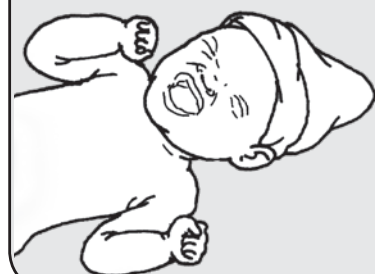

# 4b. TREAT AND ADVISE

If the child has any of the symptoms below with NO danger signs, give the following treatment:

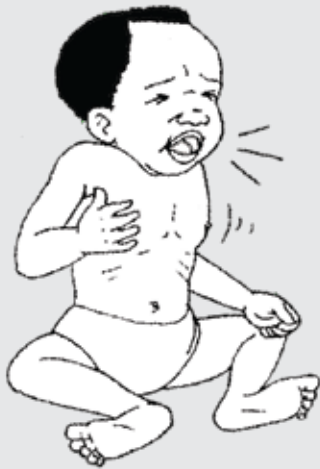

## Cough

With fast breathing for less than 21 days

- Give oral antibiotic – Amoxicillin.
- Advise caregiver to give:
  - 2 - 11 months:  2 tabs twice a day for 5 days from RED PACK
  - 1 - 5 years:  3 tabs twice a day for 5 days from GREEN PACK
- Help caregiver give first dose now.

## Diarrhoea

For less than 14 days, and without blood in stool

- Give ORS. Help caregiver give child ORS solution in front of you until the child is no longer thirsty.
- Give caregiver 2 ORS packets to take home.   
Advise caregiver to give as much as child wants, but at least ½ cup ORS solution after each loose stool.
- Give zinc supplement. Give 1 dose daily for 10 days.
  - 2 to 6 months:  ½ a tab once a day for 10 days
  - 6 months to 5 years:  1 tab once a day for 10 days
- Help caregiver give first dose now.

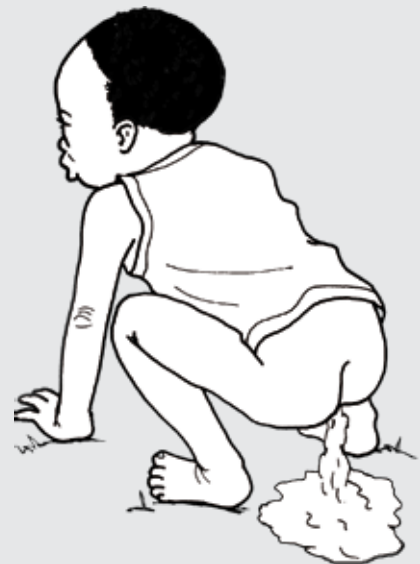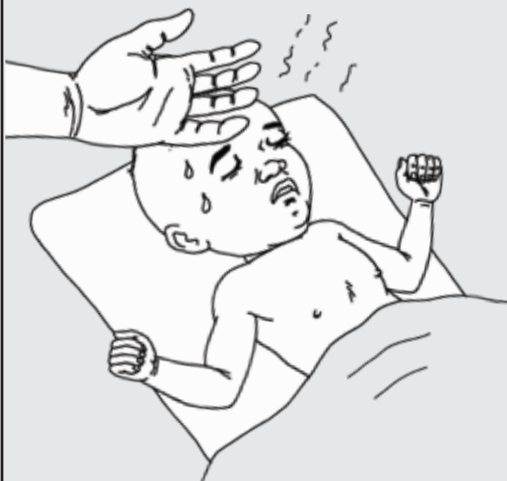

## Fever

Less than 7 days

- Give oral Anti-Malarial ACT.
  - 4 months to 2 years:  1 tab twice a day for 3 days from YELLOW PACK
  - 3 years to 5 years:  2 tab twice a day for 3 days from BLUE PACK
- Help caregiver give first dose now.
- Advise caregiver on use of a bed net (LLIN).

# 5. ADVICE FOR ALL CHILDREN TREATED AT HOME

## Give more fluids and continue feeding

- Advise caregiver to give plenty of homemade fluids such as:
  - Clean water
  - Soup
  - Yoghurt drinks
  - Light porridge
  - ORS

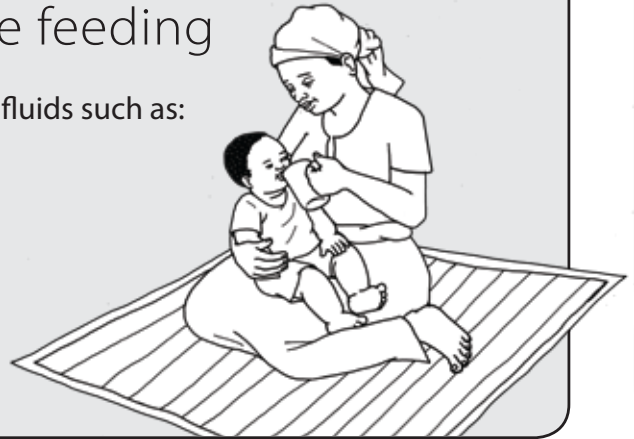

## Go to the health facility if...

- Advise to go to the health facility if the child:
  - Cannot drink or feed
  - Has blood in stool
  - Becomes sicker
  - Develops any other danger sign
  - Has not improved in 2 days

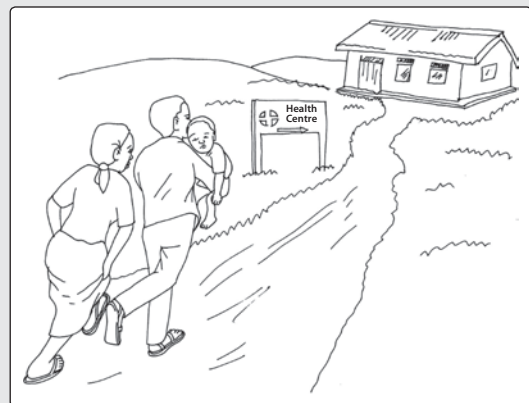

## Sleep under a net

- Advise caregiver to be sure the child sleeps under a mosquito net.

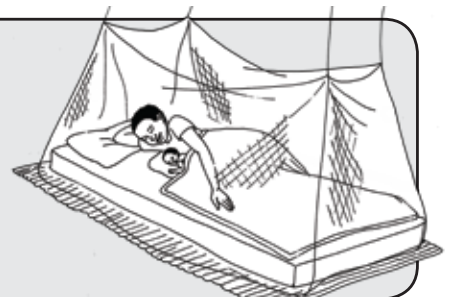

## Follow up child in 3 days

- Decide if you (the VHT member) will go to the child or if the caregiver will bring the child to you.

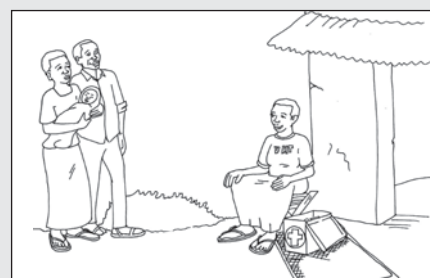

# 6. ROUTINE CARE FOR THE NEWBORN

## Keeping the baby warm

Advise the caregiver on the following:

- Wrap the baby in warm, dry clothes, including the head and feet.
- Put the baby in skin-to-skin contact with the mother, as shown in the picture.
- Delay the baby's first bath until after 24 hours.

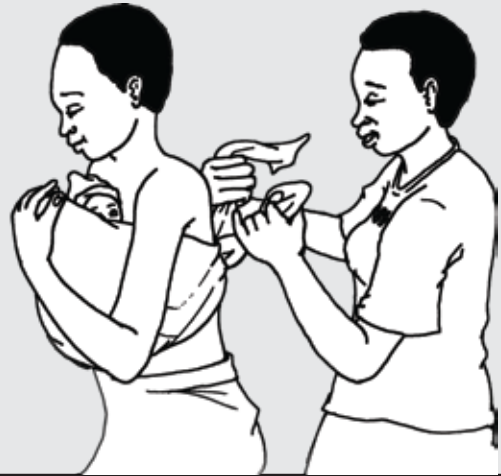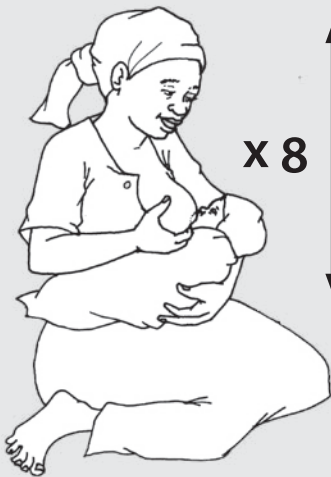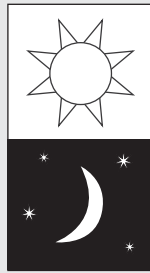

## Breastfeeding exclusively

Advise the mother on the following:

- Start breastfeeding immediately after birth.
- Feed the baby on only breast milk, on demand, at least 8 times a day.
- Ensure the baby is well positioned and attached on the mother's breast.

## Skin and cord care

Advise the caregiver on the following:

- Wash hands before handling the baby.

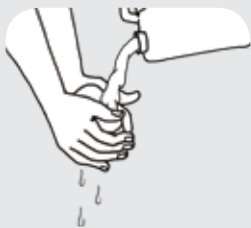

- Do not apply anything on the cord. Leave the cord dry and open.

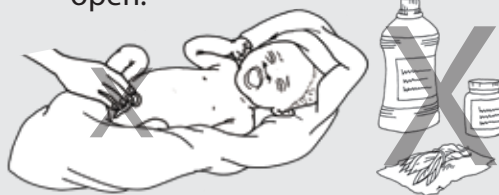

- Bathe the baby with clean soap and water.

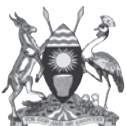

Supplement: 12936_2016_1300_MOESM1_ESM.pdf [file 12936_2016_1300_MOESM1_ESM.pdf]
